# Supplementary material for: Consumer Sensory Preferences for Conventional versus Organic Ingredients Food Ingredients in the United States
Source: Research Square preprint supplement (doi:10.21203/rs.3.rs-6413730/v1), 2025-04-15
Supplement: Supplementary file 1 [file 7ebf85c6b2c7fe2edc1dec1e.docx]

**Supplementary Information**

**Consumer Sensory Preferences for Conventional versus Organic Ingredients Food Ingredients in the United States**

Siyuan Sheng1*, Erin M. Silva2, Steven C. Ricke1, and James R. Claus1*

1Department of Animal & Dairy Sciences, University of Wisconsin-Madison, Madison, Wisconsin, 53706, United States

2Department of Plant Pathology, University of Wisconsin-Madison, Madison, Wisconsin, 53706, United States

*Corresponding author emails: [siyuan.sheng@outlook.com](mailto:siyuan.sheng@outlook.com) and [jrclaus@wisc.edu](mailto:jrclaus@wisc.edu)


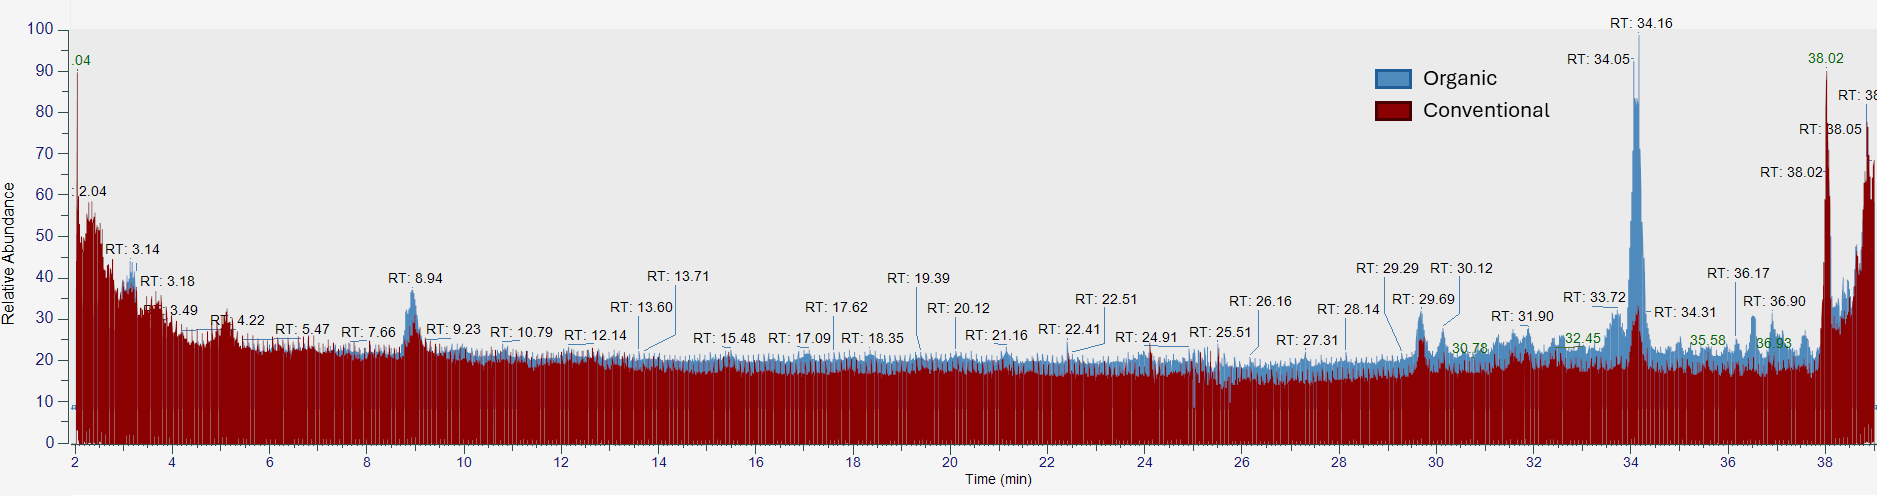


**SI Figure 1**. Comparison of total ionic compounds between pre-converted organic Swiss chard and conventional Swiss chard powder under positive (+) ionization mode. RT stands for retention time.


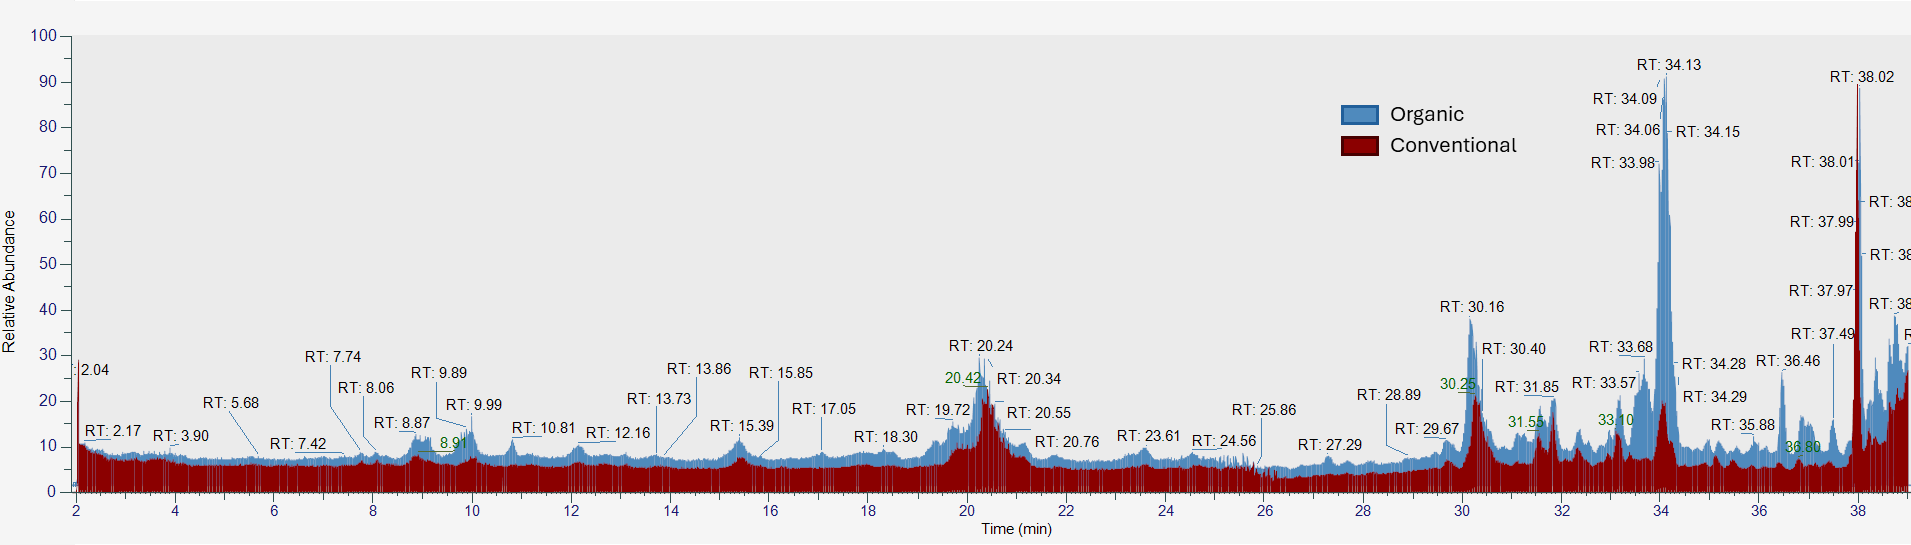


**SI Figure 2.** Comparison of total ionic compounds between pre-converted organic Swiss chard and conventional Swiss chard powder under negative (-) ionization mode. RT stands for retention time.


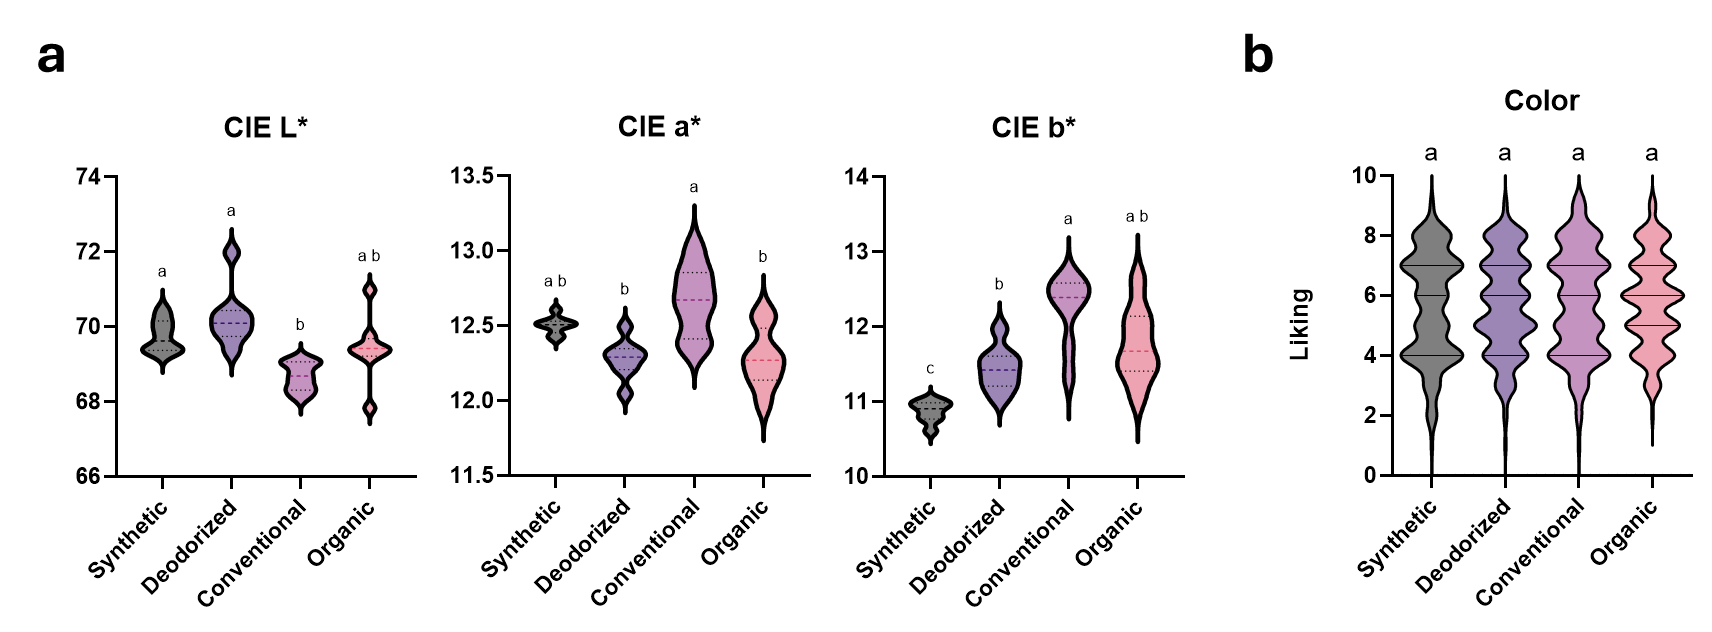


**SI Figure 3.** Color differences between organic and conventional frankfurters (day 15) along with comparison to those formulated with synthetic sodium nitrite. **a.** Instrumental analysis results of color differences, expressed in CIE *L** (lightness), *a** (redness), and *b** (yellowness) values; **b.** Consumer preferences regarding color differences, evaluated through sensory liking scores (1= dislike extremely to 9=like extremely).


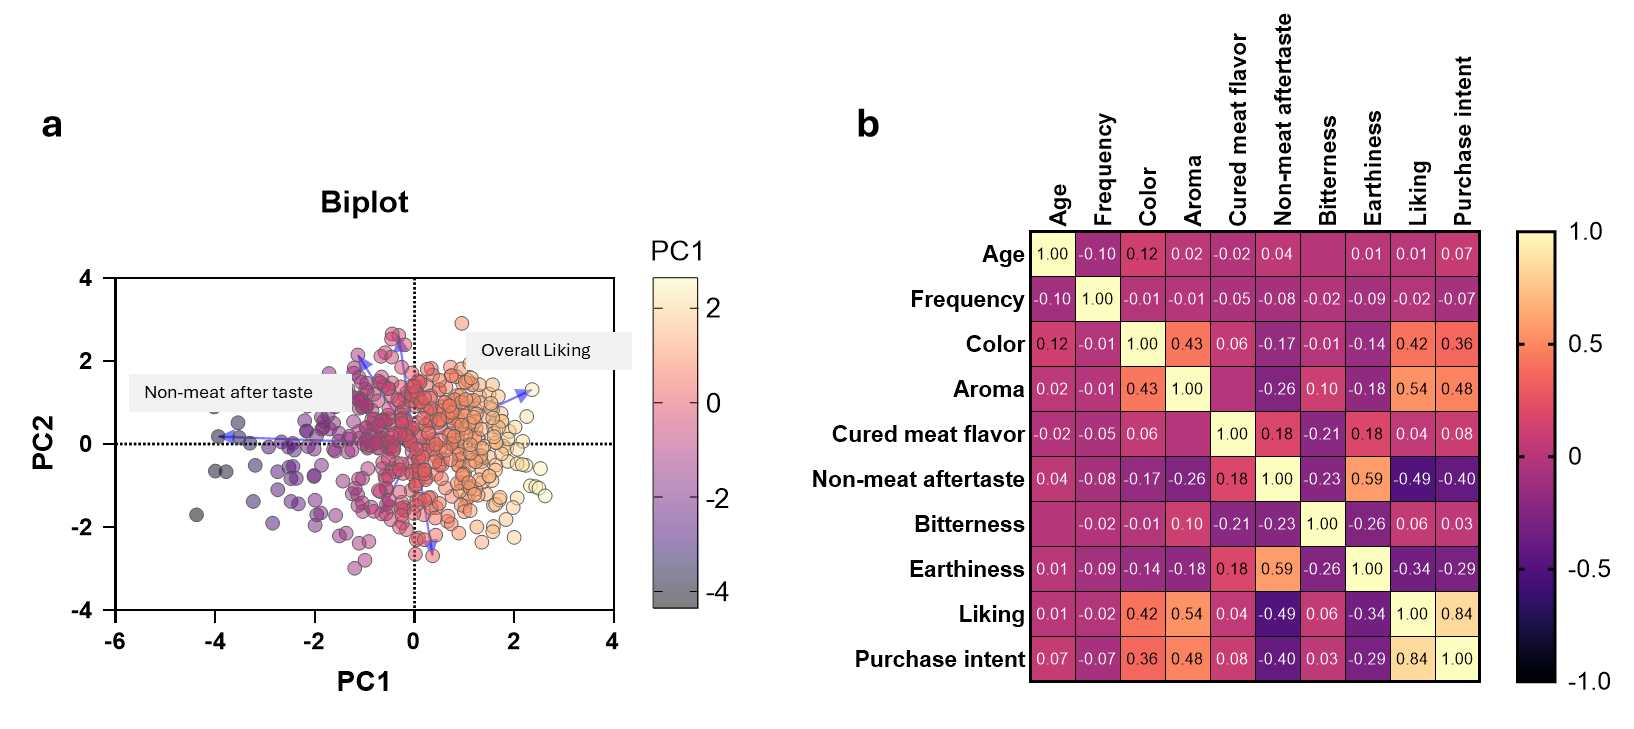


SI Figure 4. Correlation analyses on organic vs conventional cured processed meats. a, Principal component analysis. b, Pearson’s r correlation.


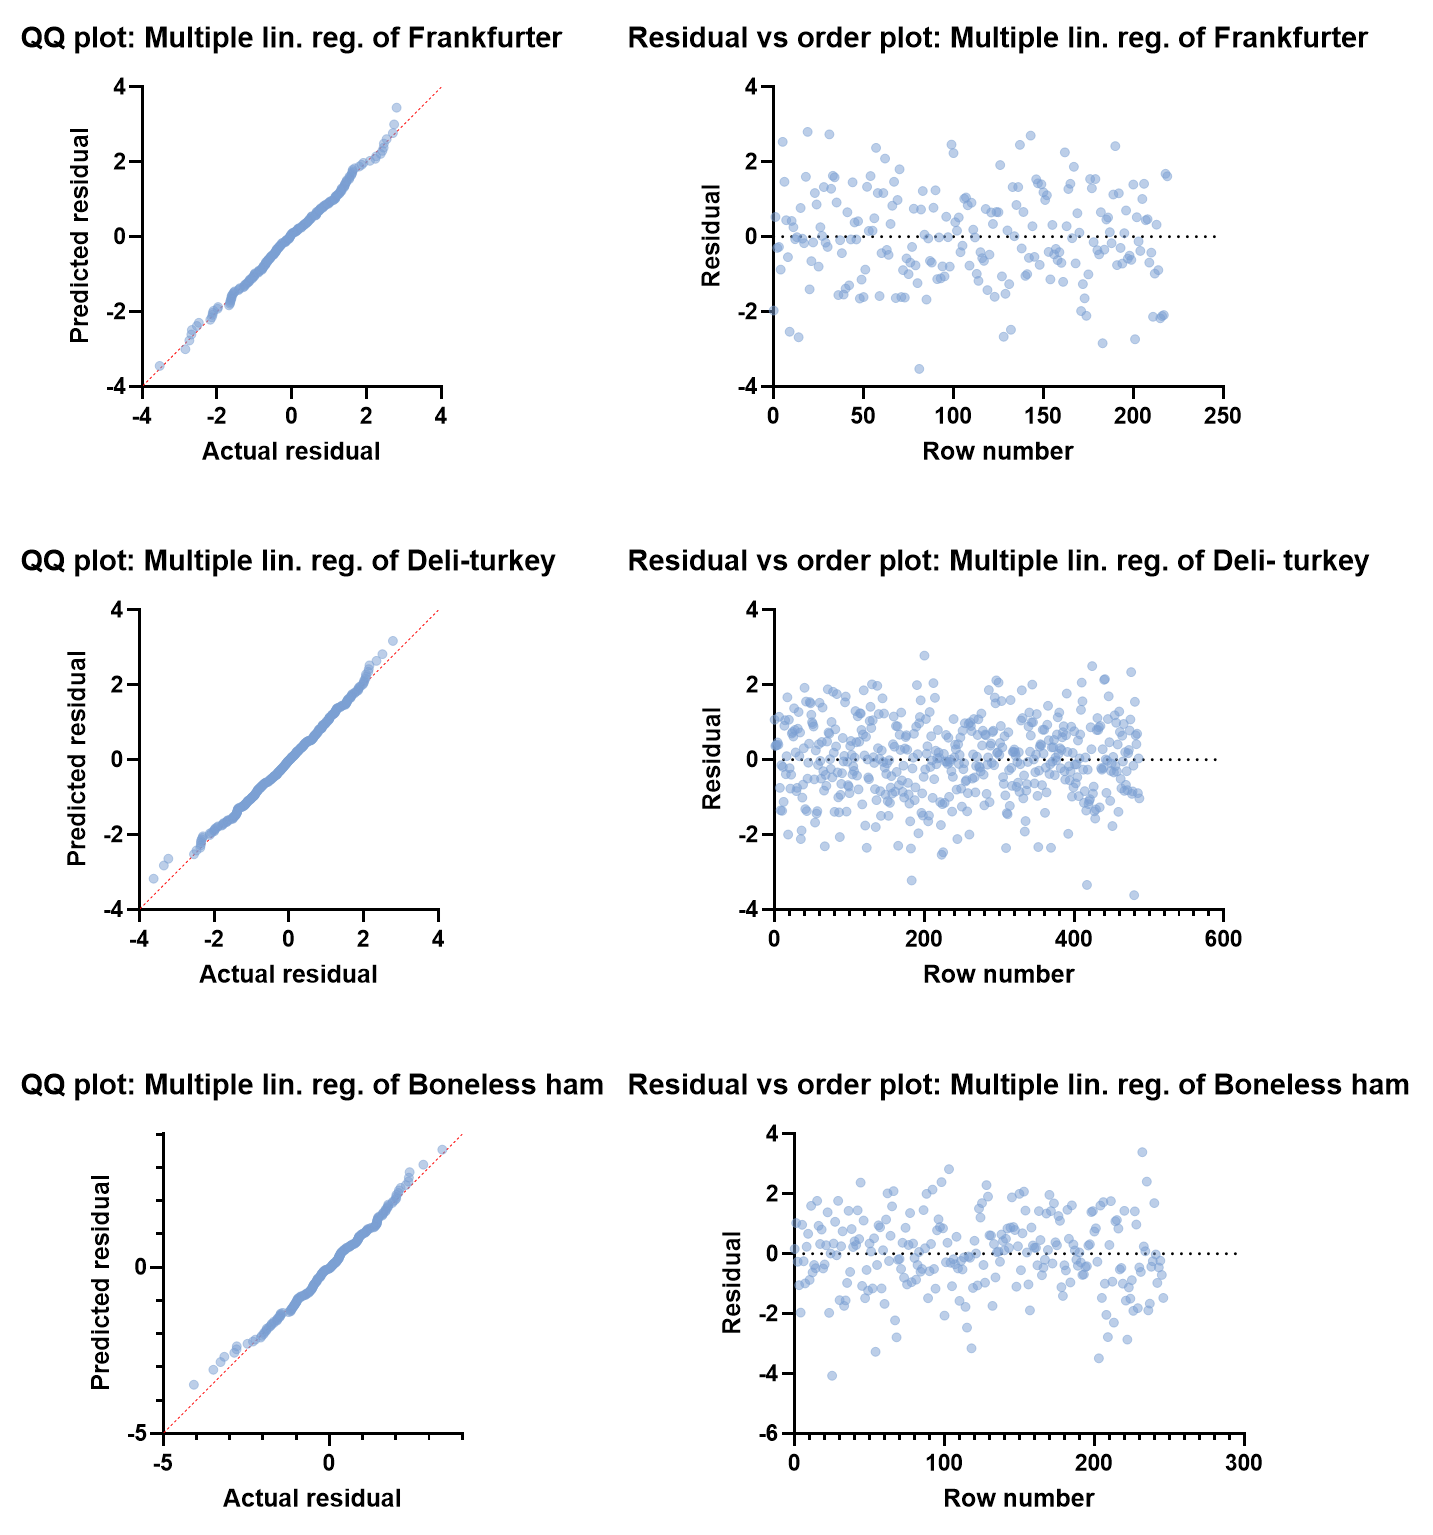


SI Figure 5. Residuals vs. Order Plot and Quantile-Quantile (Q-Q) Plot for the multilinear regression models.

**Table S1.** Concentration of selected active phytochemicals in organic vs conventional pre-converted Swiss chard powder (soybean excluded daidzein was used as standard for concentration measurement).

| Groups | Compound Name | Observed m/z | Ionization mode | MS/MS Fragments | Concentration in -Organic (ppm) | Concentration in Conventional (ppm) |
| --- | --- | --- | --- | --- | --- | --- |
| Flavonoid | Apigenin-6-C-galactoside-8-C-arabinoside | 563.1400 | Negative | 545.13, 503.11, 473.10, 443.09, 383.07, 353.06 | 94.56 | 11.65 |
| Quercetin-3-neohesperidoside | 609.1455 | Negative | 245.04, 205.05,151.04,137.02 | 7.71 | 32.95 |
| Apigenin 6,8-di-C-glucoside (Vicenin-2) | 593.1506 | Negative | 503.11,473.10, 383.07,353.06 | 3.02 | 10.41 |
| Isorhamnetin diglucoside | 639.1563 | Negative | 447.01, 315.01 | 8.02 | 166.08 |
| Isovitexin 7-O-xyloside-2''-O-glucoside | 565.1549 | Positive | 433.1130, 313.0706 | 77.17 | 773.54 |
